# Supplementary material for: A Quality Control System for Automated Prostate Segmentation on T2-Weighted MRI
Source: PubMed Central journal article supplement (PMC7555425; doi:10.3390/diagnostics10090714), 2020-09-18
Supplement: diagnostics-10-00714-s001.pdf [file diagnostics-10-00714-s001.pdf]

**Table S1.** List of the extracted Radiomics features. The shape features were extracted from the 3-dimensional volume.

| <b>First order</b>                    | <b>Shape</b>                         |
|---------------------------------------|--------------------------------------|
| 10Percentile                          | Elongation                           |
| 90Percentile                          | Flatness                             |
| Energy                                | Least Axis Length                    |
| Entropy                               | Major Axis Length                    |
| Interquartile Range                   | Maximum 2D Diameter Column           |
| Kurtosis                              | Maximum 2D Diameter Row              |
| Maximum                               | Maximum 2D Diameter Slice            |
| Mean Absolute Deviation               | Maximum 3D Diameter                  |
| Mean                                  | Mesh Volume                          |
| Median                                | Minor Axis Length                    |
| Minimum                               | Sphericity                           |
| Range                                 | Surface Area                         |
| Robust Mean Absolute Deviation        | Surface Volume Ratio                 |
| Root Mean Squared                     | Voxel Volume                         |
| Skewness                              |                                      |
| Total Energy                          |                                      |
| Uniformity                            |                                      |
| Variance                              |                                      |
| <b>GLCM</b>                           | <b>GLRLM</b>                         |
| Autocorrelation                       | Gray Level Non Uniformity            |
| Cluster Prominence                    | Gray Level Non Uniformity Normalized |
| Cluster Shade                         | Gray Level Variance                  |
| Cluster Tendency                      | High Gray Level Run Emphasis         |
| Contrast                              | Long Run Emphasis                    |
| Correlation                           | Long Run High Gray Level Emphasis    |
| Difference Average                    | Long Run Low Gray Level Emphasis     |
| Difference Entropy                    | Low Gray Level Run Emphasis          |
| Difference Variance                   | Run Entropy                          |
| Inverse Difference                    | Run Length Non Uniformity            |
| Inverse Difference Moment             | Run Length Non Uniformity Normalized |
| Inverse Difference Moment Normalized  | Run Percentage                       |
| Inverse Difference Normalized         | Run Variance                         |
| Informational Measure of Correlation1 | Short Run Emphasis                   |
| Informational Measure of Correlation2 | Short Run High Gray Level Emphasis   |
| Inverse Variance                      | Short Run Low Gray Level Emphasis    |
| Joint Average                         |                                      |
| Joint Energy                          |                                      |
| Joint Entropy                         |                                      |
| Maximal Correlation Coefficient       |                                      |
| Maximum Probability                   |                                      |
| Sum Average                           |                                      |
| Sum Entropy                           |                                      |
| Sum Squares                           |                                      |

| GLSZM                                | GLDM                                      |
|--------------------------------------|-------------------------------------------|
| Gray Level Non Uniformity            | Dependence Entropy                        |
| Gray Level Non Uniformity Normalized | Dependence Non Uniformity                 |
| Gray Level Variance                  | Dependence Non Uniformity Normalized      |
| High Gray Level Zone Emphasis        | Dependence Variance                       |
| Large Area Emphasis                  | Gray Level Non Uniformity                 |
| Large Area High Gray Level Emphasis  | Gray Level Variance                       |
| Large Area Low Gray Level Emphasis   | High Gray Level Emphasis                  |
| Low Gray Level Zone Emphasis         | Large Dependence Emphasis                 |
| Size Zone Non Uniformity             | Large Dependence High Gray Level Emphasis |
| Size Zone Non Uniformity Normalized  | Large Dependence Low Gray Level Emphasis  |
| Small Area Emphasis                  | Low Gray Level Emphasis                   |
| Small Area High Gray Level Emphasis  | Small Dependence Emphasis                 |
| Small Area Low Gray Level Emphasis   | Small Dependence High Gray Level Emphasis |
| Zone Entropy                         | Small Dependence Low Gray Level Emphasis  |
| Zone Percentage                      |                                           |
| Zone Variance                        |                                           |
| NGTDM                                |                                           |
| Busyness                             |                                           |
| Coarseness                           |                                           |
| Complexity                           |                                           |
| Contrast                             |                                           |
| Strength                             |                                           |

Table S2. The trained General model intercept and coefficients.

| Feature                          | Coefficient  |
|----------------------------------|--------------|
| Intercept                        | -589.649     |
| firstorder_10Percentile_WP       | -0.146612531 |
| firstorder_90Percentile_WP       | 0.314        |
| firstorder_Kurtosis_WP           | -0.117812674 |
| firstorder_Maximum_WP            | -0.084492677 |
| firstorder_Skewness_WP           | 0.593        |
| firstorder_TotalEnergy_WP        | 1.02358E-08  |
| firstorder_Uniformity_WP         | 230.905      |
| shape_Elongation_WP              | 5.983        |
| shape_Flatness_WP                | 4.539        |
| shape_MajorAxisLength_WP         | -0.06845567  |
| shape_Maximum2DDiameterColumn_WP | -0.230560053 |
| shape_Maximum2DDiameterRow_WP    | -0.197985328 |
| shape_Maximum2DDiameterSlice_WP  | 0.097        |
| shape_Maximum3DDiameter_WP       | -0.017992308 |
| shape_Sphericity_WP              | 60.282       |
| shape_SurfaceArea_WP             | 0.000246851  |
| shape_SurfaceVolumeRatio_WP      | 14.199       |
| shape_VoxelVolume_WP             | 1.89481E-05  |
| glcm_Autocorrelation_WP          | 0.012        |
| glcm_ClusterProminence_WP        | 2.54466E-06  |
| glcm_ClusterShade_WP             | -0.000307025 |

|                                              |              |
|----------------------------------------------|--------------|
| glcm_Correlation_WP                          | -6.007937184 |
| glcm_Idmn_WP                                 | 399.583      |
| glcm_Idn_WP                                  | 39.058       |
| glcm_Imc2_WP                                 | -2.099325012 |
| glcm_MCC_WP                                  | 1.038        |
| glcm_MaximumProbability_WP                   | 399.127      |
| glcm_SumSquares_WP                           | -0.009626445 |
| glrlm_GrayLevelNonUniformity_WP              | 8.3781E-05   |
| glrlm_RunEntropy_WP                          | -3.564375279 |
| glrlm_ShortRunEmphasis_WP                    | 169.42       |
| glrlm_ShortRunLowGrayLevelEmphasis_WP        | -94.32961035 |
| glszm_GrayLevelNonUniformityNormalized_WP    | -6.943523116 |
| glszm_HighGrayLevelZoneEmphasis_WP           | -0.000191147 |
| glszm_LargeAreaEmphasis_WP                   | -7.997E-05   |
| glszm_LargeAreaHighGrayLevelEmphasis_WP      | -1.77614E-07 |
| glszm_LowGrayLevelZoneEmphasis_WP            | -826.0651781 |
| glszm_SizeZoneNonUniformity_WP               | 0.00055125   |
| glszm_SmallAreaEmphasis_WP                   | 13.466       |
| ngtdm_Coarseness_WP                          | -1711.077441 |
| ngtdm_Complexity_WP                          | -1.5201E-05  |
| ngtdm_Contrast_WP                            | -41.04467909 |
| gldm_LargeDependenceHighGrayLevelEmphasis_WP | -0.001140483 |
| gldm_LargeDependenceLowGrayLevelEmphasis_WP  | 2.304        |
| gldm_SmallDependenceLowGrayLevelEmphasis_WP  | 4037.305     |
| firstorder_10Percentile_Apex                 | 0.07         |
| firstorder_90Percentile_Apex                 | 0.005208716  |
| firstorder_InterquartileRange_Apex           | -0.167191767 |
| firstorder_Kurtosis_Apex                     | -1.413813301 |
| firstorder_Maximum_Apex                      | 0.002036756  |
| firstorder_Range_Apex                        | 0.022        |
| firstorder_TotalEnergy_Apex                  | 3.86153E-09  |
| firstorder_Variance_Apex                     | -0.003263068 |
| shape_Flatness_Apex                          | 4.344        |
| shape_LeastAxisLength_Apex                   | -0.25878969  |
| shape_MajorAxisLength_Apex                   | -0.181309904 |
| shape_Maximum2DDiameterColumn_Apex           | 0.144        |
| shape_Maximum2DDiameterRow_Apex              | -0.05676138  |
| shape_Maximum2DDiameterSlice_Apex            | -0.160179193 |
| shape_Maximum3DDiameter_Apex                 | 0.128        |
| shape_MinorAxisLength_Apex                   | -0.078853106 |
| shape_Sphericity_Apex                        | -18.44345633 |
| shape_SurfaceVolumeRatio_Apex                | -8.651565013 |
| glcm_Autocorrelation_Apex                    | 0.002396675  |
| glcm_ClusterProminence_Apex                  | 1.58546E-05  |
| glcm_ClusterShade_Apex                       | -0.000233358 |
| glcm_Contrast_Apex                           | 0.024        |
| glcm_DifferenceEntropy_Apex                  | -3.181807907 |
| glcm_Imc2_Apex                               | -24.38850896 |
| glcm_InverseVariance_Apex                    | -4.997607902 |
| glcm_JointAverage_Apex                       | 0.257        |
| glcm_MCC_Apex                                | -5.063286745 |

|                                               |              |
|-----------------------------------------------|--------------|
| glcm_MaximumProbability_Apex                  | 274.934      |
| glcm_SumAverage_Apex                          | 0.000565326  |
| glcm_SumEntropy_Apex                          | 8.527        |
| glrlm_GrayLevelNonUniformityNormalized_Apex   | 29.468       |
| glszm_LowGrayLevelZoneEmphasis_Apex           | -74.12210353 |
| glszm_SizeZoneNonUniformity_Apex              | -0.001095124 |
| glszm_SmallAreaEmphasis_Apex                  | -21.1662332  |
| glszm_SmallAreaHighGrayLevelEmphasis_Apex     | 0.000109585  |
| glszm_SmallAreaLowGrayLevelEmphasis_Apex      | -646.1424857 |
| ngtdm_Coarseness_Apex                         | -100.5948909 |
| ngtdm_Complexity_Apex                         | -0.0004838   |
| ngtdm_Contrast_Apex                           | -9.923565475 |
| gldm_DependenceNonUniformityNormalized_Apex   | -8.445707876 |
| gldm_DependenceVariance_Apex                  | 1.657        |
| gldm_GrayLevelNonUniformity_Apex              | 0.002130354  |
| gldm_LargeDependenceLowGrayLevelEmphasis_Apex | 11.498       |
| gldm_SmallDependenceLowGrayLevelEmphasis_Apex | 1392.455     |
| firstorder_10Percentile_Base                  | -0.04819649  |
| firstorder_InterquartileRange_Base            | 0.023        |
| firstorder_Kurtosis_Base                      | 0.099        |
| firstorder_Median_Base                        | 0.093        |
| firstorder_Minimum_Base                       | 0.067        |
| firstorder_Range_Base                         | -0.024171931 |
| firstorder_RobustMeanAbsoluteDeviation_Base   | 0.005885974  |
| firstorder_Skewness_Base                      | 0.311        |
| firstorder_TotalEnergy_Base                   | -5.06827E-08 |
| firstorder_Variance_Base                      | -0.000494672 |
| shape_Elongation_Base                         | 7.267        |
| shape_Flatness_Base                           | -7.148647697 |
| shape_MajorAxisLength_Base                    | 0.015        |
| shape_Maximum2DDiameterColumn_Base            | 0.088        |
| shape_Maximum2DDiameterRow_Base               | -0.029136784 |
| shape_Maximum2DDiameterSlice_Base             | 0.145        |
| shape_Maximum3DDiameter_Base                  | -0.15695807  |
| shape_MinorAxisLength_Base                    | -0.299508723 |
| shape_Sphericity_Base                         | 7.676        |
| shape_SurfaceArea_Base                        | 0.001355521  |
| shape_SurfaceVolumeRatio_Base                 | -7.966227392 |
| glcm_ClusterProminence_Base                   | 2.78103E-06  |
| glcm_ClusterShade_Base                        | 0.000147965  |
| glcm_Contrast_Base                            | 0.024        |
| glcm_Correlation_Base                         | -4.439963012 |
| glcm_DifferenceVariance_Base                  | -0.091992981 |
| glcm_Imc1_Base                                | 7.974        |
| glcm_InverseVariance_Base                     | 3.67         |
| glcm_JointEntropy_Base                        | 1.319        |
| glcm_MCC_Base                                 | -4.742227434 |
| glcm_MaximumProbability_Base                  | 27.757       |
| glcm_SumSquares_Base                          | 7.24288E-07  |
| glrlm_GrayLevelNonUniformity_Base             | 0.000624266  |
| glrlm_GrayLevelNonUniformityNormalized_Base   | 162.796      |

|                                                |              |
|------------------------------------------------|--------------|
| glrlm_GrayLevelVariance_Base                   | 0.024        |
| glrlm_RunLengthNonUniformityNormalized_Base    | -2.037792585 |
| glrlm_RunPercentage_Base                       | -43.98514778 |
| glszm_GrayLevelVariance_Base                   | 0.002715081  |
| glszm_HighGrayLevelZoneEmphasis_Base           | -0.005185856 |
| glszm_LargeAreaEmphasis_Base                   | 0.001428885  |
| glszm_LargeAreaHighGrayLevelEmphasis_Base      | -5.14652E-06 |
| glszm_LargeAreaLowGrayLevelEmphasis_Base       | -0.024674203 |
| glszm_SizeZoneNonUniformity_Base               | -0.000780204 |
| glszm_SizeZoneNonUniformityNormalized_Base     | 31.825       |
| glszm_SmallAreaHighGrayLevelEmphasis_Base      | -0.000885754 |
| ngtdm_Coarseness_Base                          | -258.3717435 |
| ngtdm_Complexity_Base                          | -0.000762292 |
| ngtdm_Contrast_Base                            | -29.49518732 |
| ngtdm_Strength_Base                            | 0.014        |
| gldm_DependenceEntropy_Base                    | 11.801       |
| gldm_DependenceNonUniformityNormalized_Base    | 0.814        |
| gldm_DependenceVariance_Base                   | -1.555376005 |
| gldm_GrayLevelVariance_Base                    | 0.017        |
| gldm_LargeDependenceHighGrayLevelEmphasis_Base | -4.40462E-05 |
| gldm_SmallDependenceLowGrayLevelEmphasis_Base  | -664.1445652 |

The Radiomics features named as: Feature type\_Feature name\_Extraction area. WP: whole prostate.

**Table S3.** The trained PROSTATEx - U-Net model intercept and coefficients.

| <b>Feature</b>                            | <b>Coefficient</b> |
|-------------------------------------------|--------------------|
| Intercept                                 | -321.976           |
| firstorder_10Percentile_WP                | -0.361109955       |
| firstorder_InterquartileRange_WP          | 0.169              |
| firstorder_Kurtosis_WP                    | 2.423              |
| firstorder_Minimum_WP                     | -0.156260053       |
| firstorder_Range_WP                       | 0.039              |
| firstorder_RobustMeanAbsoluteDeviation_WP | 1.557              |
| firstorder_TotalEnergy_WP                 | 2.22304E-08        |
| firstorder_Variance_WP                    | -0.046085079       |
| shape_Elongation_WP                       | 1.968              |
| shape_MajorAxisLength_WP                  | -0.250079909       |
| shape_Maximum2DDiameterColumn_WP          | -0.257196182       |
| shape_Maximum2DDiameterRow_WP             | -0.145420583       |
| shape_Maximum2DDiameterSlice_WP           | -0.01886947        |
| shape_Maximum3DDiameter_WP                | -0.130069698       |
| shape_MeshVolume_WP                       | 0.000120006        |
| shape_MinorAxisLength_WP                  | 0.396              |
| glcm_ClusterProminence_WP                 | 2.71164E-06        |
| glcm_ClusterShade_WP                      | 0.000646111        |
| glcm_Correlation_WP                       | -30.71256449       |
| glcm_Idmn_WP                              | 76.422             |
| glcm_Imc1_WP                              | 64.115             |
| glcm_Imc2_WP                              | -42.31670998       |
| glcm_MCC_WP                               | 16.528             |
| glcm_MaximumProbability_WP                | -1094.72248        |
| glszm_GrayLevelNonUniformityNormalized_WP | 780.396            |

|                                              |              |
|----------------------------------------------|--------------|
| glszm_SizeZoneNonUniformity_WP               | 0.000570052  |
| glszm_SmallAreaLowGrayLevelEmphasis_WP       | -2417.522262 |
| glszm_ZoneEntropy_WP                         | -8.843609049 |
| glszm_ZonePercentage_WP                      | -7.43438445  |
| ngtdm_Coarseness_WP                          | 8643.934     |
| ngtdm_Complexity_WP                          | -0.001616607 |
| ngtdm_Strength_WP                            | 4.063        |
| gldm_DependenceEntropy_WP                    | 41.577       |
| gldm_DependenceNonUniformityNormalized_WP    | -1.37948949  |
| gldm_LargeDependenceHighGrayLevelEmphasis_WP | -0.001317192 |
| gldm_LargeDependenceLowGrayLevelEmphasis_WP  | 64.421       |
| firstorder_90Percentile_Apex                 | -0.107347033 |
| firstorder_InterquartileRange_Apex           | 0.329        |
| firstorder_Kurtosis_Apex                     | 0.336        |
| firstorder_Maximum_Apex                      | -0.000548995 |
| firstorder_Median_Apex                       | -0.13347353  |
| firstorder_Minimum_Apex                      | -0.024977611 |
| firstorder_Variance_Apex                     | 0.002616362  |
| shape_Elongation_Apex                        | 5.729        |
| shape_LeastAxisLength_Apex                   | -0.410394504 |
| shape_MajorAxisLength_Apex                   | -0.359425987 |
| shape_Maximum2DDiameterColumn_Apex           | 0.279        |
| shape_Maximum2DDiameterRow_Apex              | 0.036        |
| shape_Maximum2DDiameterSlice_Apex            | 0.207        |
| shape_MinorAxisLength_Apex                   | -0.384513413 |
| shape_Sphericity_Apex                        | 3.807        |
| shape_SurfaceVolumeRatio_Apex                | -44.062383   |
| glcm_ClusterShade_Apex                       | -0.000321166 |
| glcm_Correlation_Apex                        | 6.09         |
| glcm_Idn_Apex                                | -15.19375392 |
| glcm_Imc2_Apex                               | -5.01588654  |
| glcm_JointAverage_Apex                       | 1.1824E-05   |
| glcm_JointEnergy_Apex                        | -3038.847586 |
| glcm_JointEntropy_Apex                       | -19.36122323 |
| glcm_MCC_Apex                                | -11.42593655 |
| glcm_MaximumProbability_Apex                 | 2787.13      |
| glcm_SumAverage_Apex                         | 0.503        |
| glcm_SumEntropy_Apex                         | 44.621       |
| glrlm_GrayLevelNonUniformity_Apex            | -0.004539868 |
| glrlm_LongRunLowGrayLevelEmphasis_Apex       | -2134.126787 |
| glrlm_ShortRunLowGrayLevelEmphasis_Apex      | -665.1488514 |
| glszm_GrayLevelNonUniformityNormalized_Apex  | -691.5931433 |
| glszm_GrayLevelVariance_Apex                 | 0.013        |
| glszm_SizeZoneNonUniformity_Apex             | -0.000650814 |
| glszm_SizeZoneNonUniformityNormalized_Apex   | -54.0932208  |
| glszm_SmallAreaEmphasis_Apex                 | -35.20923677 |
| glszm_SmallAreaLowGrayLevelEmphasis_Apex     | 2823.613     |
| glszm_ZoneEntropy_Apex                       | 2.863        |
| glszm_ZonePercentage_Apex                    | 59.685       |
| glszm_ZoneVariance_Apex                      | -0.006606771 |
| ngtdm_Coarseness_Apex                        | 1438.473     |

|                                                |              |
|------------------------------------------------|--------------|
| ngtdm_Complexity_Apex                          | -0.000288665 |
| ngtdm_Strength_Apex                            | -3.219797197 |
| gldm_DependenceEntropy_Apex                    | -36.05944425 |
| gldm_DependenceVariance_Apex                   | 8.133        |
| gldm_HighGrayLevelEmphasis_Apex                | -0.008487508 |
| gldm_LargeDependenceHighGrayLevelEmphasis_Apex | -0.00071812  |
| gldm_LargeDependenceLowGrayLevelEmphasis_Apex  | 81.651       |
| firstorder_10Percentile_Base                   | 0.204        |
| firstorder_90Percentile_Base                   | 0.292        |
| firstorder_Kurtosis_Base                       | 0.345        |
| firstorder_Maximum_Base                        | -0.175831002 |
| firstorder_RobustMeanAbsoluteDeviation_Base    | 1.058        |
| firstorder_Skewness_Base                       | 2.1          |
| firstorder_TotalEnergy_Base                    | -1.01867E-07 |
| shape_Elongation_Base                          | 19.307       |
| shape_Flatness_Base                            | -2.189503192 |
| shape_LeastAxisLength_Base                     | 0.142        |
| shape_MajorAxisLength_Base                     | 0.191        |
| shape_Maximum2DDiameterColumn_Base             | 0.198        |
| shape_Maximum2DDiameterRow_Base                | -0.052203795 |
| shape_Maximum3DDiameter_Base                   | 0.025        |
| shape_MinorAxisLength_Base                     | -0.395836828 |
| shape_Sphericity_Base                          | -42.1834581  |
| shape_SurfaceArea_Base                         | -0.001978519 |
| shape_SurfaceVolumeRatio_Base                  | -30.98683539 |
| glcm_Autocorrelation_Base                      | 0.02         |
| glcm_ClusterProminence_Base                    | 1.6374E-05   |
| glcm_ClusterShade_Base                         | -0.000524944 |
| glcm_ClusterTendency_Base                      | -0.033890673 |
| glcm_Idm_Base                                  | -78.12670175 |
| glcm_Idmn_Base                                 | 423.115      |
| glcm_JointEnergy_Base                          | 181.847      |
| glcm_MCC_Base                                  | 10.921       |
| glcm_MaximumProbability_Base                   | -41.13260693 |
| glcm_SumSquares_Base                           | -0.05457626  |
| glrlm_GrayLevelNonUniformityNormalized_Base    | -145.1853283 |
| glrlm_RunVariance_Base                         | -39.09025331 |
| glrlm_ShortRunLowGrayLevelEmphasis_Base        | 68.658       |
| glszm_LargeAreaHighGrayLevelEmphasis_Base      | 2.40474E-05  |
| glszm_LargeAreaLowGrayLevelEmphasis_Base       | 0.387        |
| glszm_LowGrayLevelZoneEmphasis_Base            | 1340.043     |
| glszm_SizeZoneNonUniformityNormalized_Base     | -7.925389028 |
| glszm_SmallAreaLowGrayLevelEmphasis_Base       | -900.8285969 |
| glszm_ZoneVariance_Base                        | 0.015        |
| ngtdm_Busyness_Base                            | 1.77         |
| ngtdm_Complexity_Base                          | 0.000728423  |
| ngtdm_Strength_Base                            | -1.767239323 |
| gldm_GrayLevelVariance_Base                    | -0.072416517 |
| gldm_LargeDependenceLowGrayLevelEmphasis_Base  | -64.18091988 |
| gldm_SmallDependenceHighGrayLevelEmphasis_Base | -0.052635022 |

---

The Radiomics features named as: Feature type\_Feature name\_Extraction area. WP: whole prostate.

**Table S4.** The trained PROSTATEx - V-Net model intercept and coefficients.

| <b>Feature</b>                              | <b>Coefficient</b> |
|---------------------------------------------|--------------------|
| Intercept                                   | 382.283            |
| firstorder_90Percentile_WP                  | 0.104              |
| firstorder_InterquartileRange_WP            | -0.12899759        |
| firstorder_Median_WP                        | -0.184649075       |
| firstorder_Minimum_WP                       | -0.258722838       |
| firstorder_Skewness_WP                      | -0.499665432       |
| firstorder_TotalEnergy_WP                   | 1.14172E-08        |
| firstorder_Uniformity_WP                    | 734.318            |
| firstorder_Variance_WP                      | -0.003975761       |
| shape_Elongation_WP                         | 14.085             |
| shape_Flatness_WP                           | -26.24663162       |
| shape_LeastAxisLength_WP                    | -0.188759158       |
| shape_Maximum2DDiameterColumn_WP            | -0.350192943       |
| shape_Maximum2DDiameterRow_WP               | -0.275736401       |
| shape_Maximum2DDiameterSlice_WP             | 0.178              |
| shape_Maximum3DDiameter_WP                  | 0.103              |
| shape_Sphericity_WP                         | 23.296             |
| shape_SurfaceVolumeRatio_WP                 | -187.1852196       |
| glcm_Autocorrelation_WP                     | 0.026              |
| glcm_ClusterProminence_WP                   | -2.64673E-06       |
| glcm_ClusterShade_WP                        | -0.000443921       |
| glcm_Correlation_WP                         | -7.74557482        |
| glcm_DifferenceVariance_WP                  | -0.205850712       |
| glcm_Imc1_WP                                | 49.886             |
| glcm_MCC_WP                                 | 36.646             |
| glcm_MaximumProbability_WP                  | 572.011            |
| glrlm_GrayLevelNonUniformity_WP             | -0.001540021       |
| glrlm_RunVariance_WP                        | -80.71373963       |
| glszm_LargeAreaLowGrayLevelEmphasis_WP      | 0.032              |
| glszm_SizeZoneNonUniformity_WP              | 0.000386128        |
| glszm_SizeZoneNonUniformityNormalized_WP    | -4.383540801       |
| glszm_SmallAreaHighGrayLevelEmphasis_WP     | 0.019              |
| glszm_SmallAreaLowGrayLevelEmphasis_WP      | 0.022              |
| glszm_ZoneEntropy_WP                        | 0.207              |
| ngtdm_Coarseness_WP                         | 31851.18           |
| ngtdm_Complexity_WP                         | -0.000796818       |
| ngtdm_Strength_WP                           | 7.652              |
| gldm_DependenceEntropy_WP                   | -3.524423106       |
| gldm_LowGrayLevelEmphasis_WP                | 202.878            |
| gldm_SmallDependenceLowGrayLevelEmphasis_WP | 2828.786           |
| firstorder_10Percentile_Apex                | -0.176567555       |
| firstorder_InterquartileRange_Apex          | -0.139750995       |
| firstorder_Kurtosis_Apex                    | -0.269244183       |
| firstorder_Minimum_Apex                     | 0.088              |
| firstorder_Skewness_Apex                    | 7.323              |
| firstorder_Variance_Apex                    | 0.011              |
| shape_Elongation_Apex                       | -15.28827643       |
| shape_Flatness_Apex                         | -9.750282188       |
| shape_MajorAxisLength_Apex                  | -1.049820093       |



|                                                |              |
|------------------------------------------------|--------------|
| shape_Maximum2DDiameterColumn_Apex             | -0.062538105 |
| shape_Maximum2DDiameterRow_Apex                | -0.011840197 |
| shape_Maximum2DDiameterSlice_Apex              | 0.802        |
| shape_Maximum3DDiameter_Apex                   | -0.797852217 |
| shape_MeshVolume_Apex                          | 0.000260848  |
| shape_MinorAxisLength_Apex                     | 0.241        |
| shape_Sphericity_Apex                          | -69.6374527  |
| shape_VoxelVolume_Apex                         | 0.000124394  |
| glcm_ClusterProminence_Apex                    | 1.57165E-05  |
| glcm_ClusterShade_Apex                         | -0.002219026 |
| glcm_Correlation_Apex                          | 12.85        |
| glcm_DifferenceEntropy_Apex                    | -4.09303929  |
| glcm_DifferenceVariance_Apex                   | -0.032803925 |
| glcm_Imc1_Apex                                 | -11.12989885 |
| glcm_Imc2_Apex                                 | -13.6901273  |
| glcm_JointEnergy_Apex                          | -6990.37425  |
| glcm_MCC_Apex                                  | -31.9032659  |
| glcm_MaximumProbability_Apex                   | 1533.047     |
| glcm_SumAverage_Apex                           | 0.089        |
| glcm_SumEntropy_Apex                           | 13.538       |
| glrlm_RunLengthNonUniformityNormalized_Apex    | -92.79630735 |
| glrlm_ShortRunEmphasis_Apex                    | -61.55064738 |
| glszm_GrayLevelNonUniformityNormalized_Apex    | 101.119      |
| glszm_LargeAreaHighGrayLevelEmphasis_Apex      | -0.000181693 |
| glszm_LargeAreaLowGrayLevelEmphasis_Apex       | 5.608        |
| glszm_SmallAreaHighGrayLevelEmphasis_Apex      | -0.014196094 |
| glszm_ZoneVariance_Apex                        | -0.049201918 |
| ngtdm_Busyness_Apex                            | 2.637        |
| ngtdm_Complexity_Apex                          | 0.000669415  |
| ngtdm_Contrast_Apex                            | -4.427026509 |
| gldm_DependenceEntropy_Apex                    | 1.031        |
| gldm_DependenceNonUniformityNormalized_Apex    | 92.378       |
| gldm_LargeDependenceEmphasis_Apex              | 3.355        |
| gldm_LargeDependenceHighGrayLevelEmphasis_Apex | 0.001035733  |
| gldm_LargeDependenceLowGrayLevelEmphasis_Apex  | -50.79463837 |
| gldm_LowGrayLevelEmphasis_Apex                 | -157.2508035 |
| gldm_SmallDependenceLowGrayLevelEmphasis_Apex  | -2099.038966 |
| firstorder_10Percentile_Base                   | -0.587515943 |
| firstorder_90Percentile_Base                   | 0.286        |
| firstorder_Energy_Base                         | 9.70197E-09  |
| firstorder_InterquartileRange_Base             | -0.393165233 |
| firstorder_Kurtosis_Base                       | 1.857        |
| firstorder_Skewness_Base                       | -9.12033662  |
| firstorder_TotalEnergy_Base                    | 2.81459E-08  |
| shape_Elongation_Base                          | 18.966       |
| shape_LeastAxisLength_Base                     | -0.177479526 |
| shape_MajorAxisLength_Base                     | 0.15         |
| shape_Maximum2DDiameterColumn_Base             | 0.125        |
| shape_Maximum2DDiameterRow_Base                | 0.037        |
| shape_Maximum3DDiameter_Base                   | -0.245084468 |
| shape_MinorAxisLength_Base                     | -0.658126709 |

|                                                |              |
|------------------------------------------------|--------------|
| shape_Sphericity_Base                          | -19.69112292 |
| shape_SurfaceArea_Base                         | 7.8765E-05   |
| shape_SurfaceVolumeRatio_Base                  | -11.58048961 |
| glcm_ClusterShade_Base                         | -0.000434701 |
| glcm_Correlation_Base                          | 1.614        |
| glcm_DifferenceVariance_Base                   | -0.4222514   |
| glcm_Idm_Base                                  | -50.69111048 |
| glcm_Imc2_Base                                 | 54.678       |
| glcm_JointEnergy_Base                          | 451.315      |
| glcm_MCC_Base                                  | -8.432719431 |
| glcm_MaximumProbability_Base                   | 1006.898     |
| glcm_SumEntropy_Base                           | -5.542663873 |
| glrlm_RunLengthNonUniformityNormalized_Base    | -0.493380462 |
| glrlm_RunVariance_Base                         | -37.80154633 |
| glszm_GrayLevelNonUniformity_Base              | -0.000570521 |
| glszm_GrayLevelNonUniformityNormalized_Base    | -717.5100996 |
| glszm_LargeAreaEmphasis_Base                   | 0.005691618  |
| glszm_LargeAreaLowGrayLevelEmphasis_Base       | 0.003134206  |
| glszm_LowGrayLevelZoneEmphasis_Base            | -2803.662984 |
| glszm_SmallAreaHighGrayLevelEmphasis_Base      | -0.053575609 |
| glszm_ZoneVariance_Base                        | 3.25766E-07  |
| ngtdm_Coarseness_Base                          | -13159.97686 |
| ngtdm_Complexity_Base                          | 0.001141479  |
| ngtdm_Contrast_Base                            | 58.232       |
| gldm_DependenceEntropy_Base                    | -6.324520776 |
| gldm_DependenceNonUniformityNormalized_Base    | 112.956      |
| gldm_GrayLevelVariance_Base                    | 0.055        |
| gldm_SmallDependenceHighGrayLevelEmphasis_Base | -0.044455531 |

The Radiomics features named as: Feature type\_Feature name\_Extraction area. WP: whole prostate.

**Table S5.** The trained PROSTATEx - nnU-Net-2D model intercept and coefficients.

| Feature                          | Coefficient  |
|----------------------------------|--------------|
| Intercept                        | 796.981      |
| firstorder_10Percentile_WP       | 0.29         |
| firstorder_Energy_WP             | 1.19916E-10  |
| firstorder_InterquartileRange_WP | 0.636        |
| firstorder_Maximum_WP            | -0.109250329 |
| firstorder_Minimum_WP            | -0.694445779 |
| shape_Elongation_WP              | -24.70301357 |
| shape_Flatness_WP                | -14.17148864 |
| shape_MajorAxisLength_WP         | -0.718393217 |
| shape_Maximum2DDiameterColumn_WP | -0.202531101 |
| shape_Maximum2DDiameterRow_WP    | -0.122970008 |
| shape_Maximum2DDiameterSlice_WP  | 0.092        |
| shape_Maximum3DDiameter_WP       | -0.208910964 |
| shape_SurfaceArea_WP             | 0.00044424   |
| shape_SurfaceVolumeRatio_WP      | -193.03525   |
| glcm_ClusterProminence_WP        | 2.61885E-05  |
| glcm_ClusterShade_WP             | 0.000594259  |
| glcm_Correlation_WP              | 5.482        |
| glcm_DifferenceVariance_WP       | -0.236450592 |

|                                             |              |
|---------------------------------------------|--------------|
| glcm_JointEnergy_WP                         | 866.556      |
| glcm_MCC_WP                                 | -5.194276409 |
| glcm_SumSquares_WP                          | -0.085176649 |
| glrlm_GrayLevelNonUniformity_WP             | 0.001755906  |
| glrlm_GrayLevelNonUniformityNormalized_WP   | 162.861      |
| glszm_GrayLevelNonUniformityNormalized_WP   | -933.9826575 |
| glszm_GrayLevelVariance_WP                  | 0.026        |
| glszm_HighGrayLevelZoneEmphasis_WP          | 0.001439849  |
| glszm_SizeZoneNonUniformity_WP              | 0.000331595  |
| glszm_SmallAreaLowGrayLevelEmphasis_WP      | -1675.145157 |
| glszm_ZoneEntropy_WP                        | -3.125394281 |
| ngtdm_Coarseness_WP                         | 2096.677     |
| ngtdm_Complexity_WP                         | -0.000475403 |
| ngtdm_Contrast_WP                           | -121.8550695 |
| gldm_DependenceEntropy_WP                   | -15.70114408 |
| gldm_DependenceNonUniformityNormalized_WP   | 178.047      |
| gldm_LargeDependenceLowGrayLevelEmphasis_WP | 19.94        |
| gldm_LowGrayLevelEmphasis_WP                | 2135.631     |
| firstorder_Kurtosis_Apex                    | -2.711844451 |
| firstorder_Minimum_Apex                     | 0.129        |
| firstorder_Range_Apex                       | -0.07191723  |
| firstorder_RobustMeanAbsoluteDeviation_Apex | -0.1420014   |
| firstorder_Skewness_Apex                    | 6.353        |
| firstorder_TotalEnergy_Apex                 | 4.13619E-08  |
| shape_Elongation_Apex                       | 3.668        |
| shape_Flatness_Apex                         | -7.912707405 |
| shape_LeastAxisLength_Apex                  | -0.10926489  |
| shape_MajorAxisLength_Apex                  | -0.43237436  |
| shape_Maximum2DDiameterColumn_Apex          | 0.189        |
| shape_Maximum2DDiameterRow_Apex             | -0.073192134 |
| shape_Maximum2DDiameterSlice_Apex           | 0.178        |
| shape_Maximum3DDiameter_Apex                | -0.187472525 |
| shape_SurfaceArea_Apex                      | 0.000530272  |
| glcm_ClusterProminence_Apex                 | 2.77501E-05  |
| glcm_ClusterShade_Apex                      | -0.000451384 |
| glcm_Contrast_Apex                          | 0.254        |
| glcm_Correlation_Apex                       | -1.619781061 |
| glcm_DifferenceEntropy_Apex                 | -17.07934278 |
| glcm_DifferenceVariance_Apex                | 0.143        |
| glcm_Imc2_Apex                              | -23.14455426 |
| glcm_JointEnergy_Apex                       | -6212.219438 |
| glcm_JointEntropy_Apex                      | -6.518581485 |
| glcm_MaximumProbability_Apex                | -120.8394487 |
| glrlm_GrayLevelVariance_Apex                | -0.036884918 |
| glszm_GrayLevelVariance_Apex                | -0.179393287 |
| glszm_HighGrayLevelZoneEmphasis_Apex        | 0.021        |
| glszm_LowGrayLevelZoneEmphasis_Apex         | -267.8410649 |
| glszm_SizeZoneNonUniformity_Apex            | -0.001044345 |
| glszm_ZoneVariance_Apex                     | -0.006817436 |
| ngtdm_Complexity_Apex                       | -0.001420348 |
| ngtdm_Contrast_Apex                         | -17.76628766 |

|                                                |              |
|------------------------------------------------|--------------|
| gldm_DependenceNonUniformityNormalized_Apex    | -104.3249813 |
| gldm_GrayLevelNonUniformity_Apex               | -0.002647112 |
| gldm_LargeDependenceLowGrayLevelEmphasis_Apex  | 0.441        |
| gldm_SmallDependenceLowGrayLevelEmphasis_Apex  | 3108.422     |
| firstorder_Energy_Base                         | 2.51608E-08  |
| firstorder_Entropy_Base                        | -2.704729568 |
| firstorder_Kurtosis_Base                       | -0.419054007 |
| firstorder_Skewness_Base                       | 1.567        |
| firstorder_Uniformity_Base                     | 82.544       |
| firstorder_Variance_Base                       | 0.001343718  |
| shape_Elongation_Base                          | -5.484035842 |
| shape_Flatness_Base                            | -18.17738825 |
| shape_LeastAxisLength_Base                     | 0.996        |
| shape_MajorAxisLength_Base                     | -0.311083432 |
| shape_Maximum2DDiameterColumn_Base             | 0.425        |
| shape_Maximum2DDiameterRow_Base                | 0.102        |
| shape_Maximum2DDiameterSlice_Base              | -0.375341977 |
| shape_Maximum3DDiameter_Base                   | 0.353        |
| shape_SurfaceArea_Base                         | -0.001191261 |
| shape_SurfaceVolumeRatio_Base                  | 19.444       |
| glcm_ClusterProminence_Base                    | -2.03688E-06 |
| glcm_Correlation_Base                          | -5.390434191 |
| glcm_InverseVariance_Base                      | 37.919       |
| glcm_JointAverage_Base                         | 1.506        |
| glcm_JointEntropy_Base                         | 3.562        |
| glcm_SumAverage_Base                           | 0.001159842  |
| glrlm_GrayLevelNonUniformityNormalized_Base    | 128.364      |
| glrlm_RunLengthNonUniformityNormalized_Base    | -388.4055959 |
| glszm_LargeAreaHighGrayLevelEmphasis_Base      | -3.98377E-05 |
| glszm_LowGrayLevelZoneEmphasis_Base            | -749.5529367 |
| glszm_SmallAreaHighGrayLevelEmphasis_Base      | -0.007953134 |
| glszm_ZoneEntropy_Base                         | 2.794        |
| ngtdm_Busyness_Base                            | -4.202338416 |
| ngtdm_Complexity_Base                          | -0.001070331 |
| ngtdm_Contrast_Base                            | 23.444       |
| ngtdm_Strength_Base                            | -1.538993176 |
| gldm_DependenceNonUniformityNormalized_Base    | 135.232      |
| gldm_HighGrayLevelEmphasis_Base                | -0.01486939  |
| gldm_LargeDependenceEmphasis_Base              | 0.262        |
| gldm_LargeDependenceHighGrayLevelEmphasis_Base | -0.001878785 |
| gldm_LargeDependenceLowGrayLevelEmphasis_Base  | -38.97542234 |
| gldm_SmallDependenceLowGrayLevelEmphasis_Base  | 4057.745     |

The Radiomics features named as: Feature type\_Feature name\_Extraction area. WP: whole prostate.

**Table S6.** The trained PROSTATEx - nnU-Net-3D model intercept and coefficients.

| Feature                          | Coefficient  |
|----------------------------------|--------------|
| Intercept                        | 1309.623     |
| firstorder_10Percentile_WP       | -0.721142033 |
| firstorder_Energy_WP             | 1.11777E-08  |
| firstorder_InterquartileRange_WP | 0.466        |
| firstorder_Kurtosis_WP           | -1.807098348 |

|                                             |              |
|---------------------------------------------|--------------|
| firstorder_Minimum_WP                       | -0.414416705 |
| firstorder_RobustMeanAbsoluteDeviation_WP   | 0.343        |
| firstorder_Skewness_WP                      | 2.235        |
| firstorder_TotalEnergy_WP                   | 2.76743E-08  |
| shape_Elongation_WP                         | -14.90949407 |
| shape_Flatness_WP                           | 5.777        |
| shape_Maximum2DDiameterColumn_WP            | -0.02988986  |
| shape_Maximum3DDiameter_WP                  | -0.108640637 |
| shape_MeshVolume_WP                         | 0.000129798  |
| shape_SurfaceArea_WP                        | -0.005093056 |
| shape_SurfaceVolumeRatio_WP                 | -47.40701402 |
| shape_VoxelVolume_WP                        | 3.04889E-05  |
| glcm_ClusterShade_WP                        | 0.001115036  |
| glcm_Contrast_WP                            | -0.362129542 |
| glcm_DifferenceVariance_WP                  | -0.116939892 |
| glcm_Imc1_WP                                | 117.02       |
| glcm_JointAverage_WP                        | 0.944        |
| glcm_MCC_WP                                 | -10.81140584 |
| glcm_MaximumProbability_WP                  | 50.582       |
| glcm_SumAverage_WP                          | 0.045        |
| glrlm_GrayLevelNonUniformity_WP             | 0.001113064  |
| glrlm_GrayLevelVariance_WP                  | -0.25316124  |
| glslm_GrayLevelVariance_WP                  | -0.023530978 |
| glslm_LargeAreaHighGrayLevelEmphasis_WP     | -1.76798E-06 |
| glslm_LowGrayLevelZoneEmphasis_WP           | 2739.237     |
| glslm_SmallAreaEmphasis_WP                  | 82.808       |
| glslm_SmallAreaHighGrayLevelEmphasis_WP     | 0.021        |
| ngtdm_Busyness_WP                           | 1.076        |
| ngtdm_Coarseness_WP                         | -0.939921946 |
| ngtdm_Complexity_WP                         | 0.00427186   |
| ngtdm_Strength_WP                           | -4.814057849 |
| gldm_DependenceVariance_WP                  | -2.537048333 |
| gldm_SmallDependenceLowGrayLevelEmphasis_WP | -4212.588098 |
| firstorder_10Percentile_Apex                | -0.466481814 |
| firstorder_InterquartileRange_Apex          | -0.114658415 |
| firstorder_Kurtosis_Apex                    | -1.75226954  |
| firstorder_Median_Apex                      | 0.33         |
| firstorder_Minimum_Apex                     | 0.395        |
| firstorder_Range_Apex                       | -0.065000378 |
| firstorder_Skewness_Apex                    | 8.473        |
| shape_Elongation_Apex                       | 1.819        |
| shape_Flatness_Apex                         | -25.91600339 |
| shape_LeastAxisLength_Apex                  | 0.661        |
| shape_MajorAxisLength_Apex                  | -0.439242302 |
| shape_Maximum2DDiameterColumn_Apex          | 0.07         |
| shape_Maximum2DDiameterRow_Apex             | -0.177117185 |
| shape_Maximum2DDiameterSlice_Apex           | 0.144        |
| shape_Maximum3DDiameter_Apex                | -0.068137016 |
| glcm_ClusterProminence_Apex                 | 1.65745E-05  |
| glcm_ClusterShade_Apex                      | -0.000651419 |
| glcm_Correlation_Apex                       | -28.7185583  |

|                                                |              |
|------------------------------------------------|--------------|
| glcm_DifferenceVariance_Apex                   | -0.124905076 |
| glcm_Imc1_Apex                                 | -38.63027152 |
| glcm_Imc2_Apex                                 | 3.105        |
| glcm_InverseVariance_Apex                      | -222.5726206 |
| glcm_JointEnergy_Apex                          | 615.764      |
| glcm_MCC_Apex                                  | 1.043        |
| glrlm_LongRunLowGrayLevelEmphasis_Apex         | 370.289      |
| glrlm_ShortRunEmphasis_Apex                    | -364.7467476 |
| glszm_GrayLevelVariance_Apex                   | 0.014        |
| glszm_LargeAreaHighGrayLevelEmphasis_Apex      | -0.000126603 |
| glszm_SmallAreaEmphasis_Apex                   | -61.04673102 |
| glszm_SmallAreaLowGrayLevelEmphasis_Apex       | -1246.855983 |
| ngtdm_Busyness_Apex                            | 0.111        |
| ngtdm_Complexity_Apex                          | -0.001052067 |
| ngtdm_Contrast_Apex                            | 2.963        |
| gldm_DependenceEntropy_Apex                    | 5.341        |
| gldm_DependenceNonUniformity_Apex              | -0.000773742 |
| gldm_DependenceVariance_Apex                   | 4.539        |
| gldm_LargeDependenceHighGrayLevelEmphasis_Apex | 0.00149014   |
| gldm_SmallDependenceHighGrayLevelEmphasis_Apex | -0.00868048  |
| firstorder_10Percentile_Base                   | 1.494        |
| firstorder_InterquartileRange_Base             | -0.297270611 |
| firstorder_Kurtosis_Base                       | 0.841        |
| firstorder_Median_Base                         | -1.129276822 |
| firstorder_TotalEnergy_Base                    | 9.28406E-09  |
| firstorder_Uniformity_Base                     | -967.8388438 |
| firstorder_Variance_Base                       | 0.016        |
| shape_Elongation_Base                          | -11.1824233  |
| shape_Flatness_Base                            | -1.92091796  |
| shape_MajorAxisLength_Base                     | -0.07769645  |
| shape_Maximum2DDiameterColumn_Base             | 0.035        |
| shape_Maximum2DDiameterRow_Base                | 0.177        |
| shape_Maximum2DDiameterSlice_Base              | 0.333        |
| shape_Maximum3DDiameter_Base                   | -0.454223481 |
| shape_MinorAxisLength_Base                     | -0.041608717 |
| shape_Sphericity_Base                          | -54.66939797 |
| shape_SurfaceVolumeRatio_Base                  | -48.9220416  |
| glcm_ClusterShade_Base                         | -0.0007041   |
| glcm_ClusterTendency_Base                      | -0.003726705 |
| glcm_Correlation_Base                          | 27.166       |
| glcm_DifferenceVariance_Base                   | 0.191        |
| glcm_Imc1_Base                                 | 16.911       |
| glcm_JointAverage_Base                         | 2.628        |
| glcm_MCC_Base                                  | 5.967        |
| glcm_MaximumProbability_Base                   | -591.1130396 |
| glcm_SumEntropy_Base                           | -26.76138121 |
| glrlm_RunLengthNonUniformity_Base              | -0.000192395 |
| glrlm_RunLengthNonUniformityNormalized_Base    | -675.9008458 |
| glrlm_RunVariance_Base                         | -172.7504116 |
| glszm_GrayLevelVariance_Base                   | 3.21173E-06  |
| glszm_LargeAreaLowGrayLevelEmphasis_Base       | 1.932        |

|                                                |              |
|------------------------------------------------|--------------|
| glszm_SizeZoneNonUniformityNormalized_Base     | 71.564       |
| glszm_SmallAreaHighGrayLevelEmphasis_Base      | -0.040155764 |
| glszm_SmallAreaLowGrayLevelEmphasis_Base       | 139.748      |
| glszm_ZoneEntropy_Base                         | 4.103        |
| ngtdm_Busyness_Base                            | 1.303        |
| ngtdm_Coarseness_Base                          | -364.9687301 |
| ngtdm_Complexity_Base                          | -0.000170833 |
| ngtdm_Contrast_Base                            | 49.398       |
| ngtdm_Strength_Base                            | 2.141        |
| gldm_DependenceNonUniformity_Base              | -0.00106838  |
| gldm_DependenceVariance_Base                   | -6.512468818 |
| gldm_LargeDependenceHighGrayLevelEmphasis_Base | -0.002266611 |
| gldm_SmallDependenceLowGrayLevelEmphasis_Base  | 263.478      |

The Radiomics features named as: Feature type\_Feature name\_Extraction area. WP: whole prostate.

**Table S7.** The trained In-house - U-Net model intercept and coefficients.

| <b>Feature</b>                            | <b>Coefficient</b> |
|-------------------------------------------|--------------------|
| Intercept                                 | 58.793             |
| firstorder_10Percentile_WP                | -0.409826323       |
| firstorder_InterquartileRange_WP          | 0.105              |
| firstorder_Kurtosis_WP                    | 0.115              |
| firstorder_Minimum_WP                     | 0.642              |
| firstorder_Range_WP                       | -0.010042831       |
| firstorder_Skewness_WP                    | -1.126762793       |
| firstorder_Variance_WP                    | 0.021              |
| shape_Elongation_WP                       | 5.546              |
| shape_LeastAxisLength_WP                  | -0.588233617       |
| shape_MajorAxisLength_WP                  | -0.009761257       |
| shape_Maximum2DDiameterColumn_WP          | -0.287024615       |
| shape_Maximum2DDiameterRow_WP             | -0.084692949       |
| shape_Maximum3DDiameter_WP                | -0.35243464        |
| shape_MeshVolume_WP                       | 0.000124765        |
| shape_Sphericity_WP                       | 48.425             |
| shape_SurfaceVolumeRatio_WP               | 75.795             |
| shape_VoxelVolume_WP                      | 0.0001127          |
| glcm_Autocorrelation_WP                   | 0.065              |
| glcm_ClusterShade_WP                      | -0.000371266       |
| glcm_ClusterTendency_WP                   | -0.039895043       |
| glcm_JointAverage_WP                      | 0.00043459         |
| glcm_JointEnergy_WP                       | -3086.280781       |
| glcm_MCC_WP                               | -0.682031328       |
| glcm_MaximumProbability_WP                | 1315.363           |
| glcm_SumAverage_WP                        | 0.011              |
| glcm_SumSquares_WP                        | -0.209410018       |
| glrlm_RunEntropy_WP                       | -2.523579447       |
| glszm_GrayLevelNonUniformityNormalized_WP | -1786.604709       |
| glszm_LargeAreaHighGrayLevelEmphasis_WP   | -4.08143E-07       |
| glszm_LargeAreaLowGrayLevelEmphasis_WP    | -0.076981146       |
| glszm_LowGrayLevelZoneEmphasis_WP         | 169.134            |
| glszm_SmallAreaHighGrayLevelEmphasis_WP   | -0.05355589        |
| glszm_SmallAreaLowGrayLevelEmphasis_WP    | 120.991            |

|                                              |              |
|----------------------------------------------|--------------|
| glszm_ZoneEntropy_WP                         | -2.334812754 |
| glszm_ZonePercentage_WP                      | -24.33033128 |
| ngtdm_Busyness_WP                            | 1.616        |
| ngtdm_Coarseness_WP                          | -31168.57073 |
| ngtdm_Complexity_WP                          | -0.000218006 |
| ngtdm_Contrast_WP                            | 17.704       |
| gldm_DependenceNonUniformity_WP              | 0.000725363  |
| gldm_DependenceNonUniformityNormalized_WP    | -202.4339009 |
| gldm_DependenceVariance_WP                   | -5.690421242 |
| gldm_LargeDependenceHighGrayLevelEmphasis_WP | -0.001691745 |
| gldm_SmallDependenceLowGrayLevelEmphasis_WP  | -2640.112347 |
| firstorder_10Percentile_Apex                 | 1.024        |
| firstorder_Energy_Apex                       | -5.20773E-08 |
| firstorder_Kurtosis_Apex                     | -2.783838802 |
| firstorder_Maximum_Apex                      | -0.152991221 |
| firstorder_Minimum_Apex                      | -0.078605903 |
| firstorder_Skewness_Apex                     | 4.895        |
| shape_Elongation_Apex                        | -23.91431753 |
| shape_Flatness_Apex                          | 44.268       |
| shape_LeastAxisLength_Apex                   | -1.042189536 |
| shape_MajorAxisLength_Apex                   | -0.180133877 |
| shape_Maximum2DDiameterColumn_Apex           | 0.037        |
| shape_Maximum3DDiameter_Apex                 | 0.162        |
| shape_MinorAxisLength_Apex                   | 0.638        |
| shape_Sphericity_Apex                        | -1.663816303 |
| shape_SurfaceArea_Apex                       | -9.66892E-05 |
| shape_SurfaceVolumeRatio_Apex                | -3.74923741  |
| glcm_ClusterProminence_Apex                  | 1.20644E-05  |
| glcm_Contrast_Apex                           | 0.237        |
| glcm_Correlation_Apex                        | 3.756        |
| glcm_Idm_Apex                                | 94.084       |
| glcm_Imc1_Apex                               | 191.307      |
| glcm_Imc2_Apex                               | -19.80854251 |
| glcm_JointAverage_Apex                       | -0.165133348 |
| glcm_MCC_Apex                                | 4.809        |
| glcm_MaximumProbability_Apex                 | -592.7530633 |
| glcm_SumAverage_Apex                         | -0.164328998 |
| glrlm_RunVariance_Apex                       | 255.402      |
| glszm_GrayLevelNonUniformity_Apex            | -0.007447548 |
| glszm_GrayLevelNonUniformityNormalized_Apex  | -335.9868087 |
| glszm_GrayLevelVariance_Apex                 | 0.054        |
| glszm_LargeAreaEmphasis_Apex                 | 0.006333208  |
| glszm_SmallAreaLowGrayLevelEmphasis_Apex     | -582.8753445 |
| glszm_ZoneEntropy_Apex                       | 32.543       |
| ngtdm_Busyness_Apex                          | -4.009037279 |
| ngtdm_Complexity_Apex                        | -0.001872825 |
| ngtdm_Contrast_Apex                          | -76.42068449 |
| ngtdm_Strength_Apex                          | 2.212        |
| gldm_DependenceEntropy_Apex                  | -11.90863505 |
| gldm_DependenceNonUniformityNormalized_Apex  | 93.417       |
| gldm_LargeDependenceEmphasis_Apex            | 1.168        |



|                                                |              |
|------------------------------------------------|--------------|
| gldm_LargeDependenceHighGrayLevelEmphasis_Apex | -0.001201862 |
| gldm_LargeDependenceLowGrayLevelEmphasis_Apex  | -9.513155846 |
| gldm_LowGrayLevelEmphasis_Apex                 | 1653.482     |
| firstorder_90Percentile_Base                   | -0.156919732 |
| firstorder_Energy_Base                         | -5.6035E-08  |
| firstorder_InterquartileRange_Base             | -0.040518043 |
| firstorder_Kurtosis_Base                       | 1.093        |
| firstorder_Maximum_Base                        | -0.042287615 |
| firstorder_Minimum_Base                        | -0.174962769 |
| firstorder_Skewness_Base                       | -4.199818513 |
| firstorder_Uniformity_Base                     | -218.3511658 |
| firstorder_Variance_Base                       | 0.012        |
| shape_Elongation_Base                          | -27.82042158 |
| shape_Flatness_Base                            | 33.905       |
| shape_LeastAxisLength_Base                     | -0.561529979 |
| shape_MajorAxisLength_Base                     | 0.014        |
| shape_Maximum2DDiameterColumn_Base             | -0.164212242 |
| shape_Maximum2DDiameterRow_Base                | -0.122066823 |
| shape_Maximum2DDiameterSlice_Base              | 0.164        |
| shape_Maximum3DDiameter_Base                   | -0.012223014 |
| shape_MinorAxisLength_Base                     | 0.532        |
| shape_Sphericity_Base                          | 25.803       |
| shape_SurfaceArea_Base                         | 0.002999379  |
| shape_SurfaceVolumeRatio_Base                  | -26.29355783 |
| glcm_ClusterProminence_Base                    | 9.642E-06    |
| glcm_ClusterShade_Base                         | -0.000269434 |
| glcm_Contrast_Base                             | 0.045        |
| glcm_Correlation_Base                          | -20.08108148 |
| glcm_DifferenceEntropy_Base                    | -11.68204478 |
| glcm_DifferenceVariance_Base                   | -0.164338494 |
| glcm_Id_Base                                   | -30.79271011 |
| glcm_Idm_Base                                  | -60.74166585 |
| glcm_Imc1_Base                                 | 63.589       |
| glcm_Imc2_Base                                 | 31.805       |
| glcm_InverseVariance_Base                      | 90.95        |
| glcm_JointAverage_Base                         | -0.251969859 |
| glcm_JointEnergy_Base                          | 3.817        |
| glcm_JointEntropy_Base                         | 1.812        |
| glcm_MCC_Base                                  | -25.5010576  |
| glcm_SumAverage_Base                           | -0.005675909 |
| glcm_SumSquares_Base                           | 0.15         |
| glrlm_LongRunEmphasis_Base                     | -19.93426572 |
| glszm_GrayLevelVariance_Base                   | 0.066        |
| glszm_LargeAreaHighGrayLevelEmphasis_Base      | 3.3941E-05   |
| glszm_LargeAreaLowGrayLevelEmphasis_Base       | -0.024327213 |
| glszm_LowGrayLevelZoneEmphasis_Base            | -139.2555514 |
| glszm_SmallAreaEmphasis_Base                   | 44.033       |
| glszm_ZoneEntropy_Base                         | 13.789       |
| ngtdm_Busyness_Base                            | 0.17         |
| ngtdm_Coarseness_Base                          | 1130.563     |
| ngtdm_Complexity_Base                          | -0.001859765 |

|                                                |              |
|------------------------------------------------|--------------|
| ngtdm_Contrast_Base                            | -20.48422515 |
| ngtdm_Strength_Base                            | 0.192        |
| gldm_DependenceNonUniformity_Base              | -0.003340815 |
| gldm_DependenceNonUniformityNormalized_Base    | 57.677       |
| gldm_DependenceVariance_Base                   | 1.992        |
| gldm_GrayLevelNonUniformity_Base               | -0.002678311 |
| gldm_GrayLevelVariance_Base                    | -0.16360058  |
| gldm_LargeDependenceHighGrayLevelEmphasis_Base | -0.001055181 |
| gldm_LargeDependenceLowGrayLevelEmphasis_Base  | 6.17         |
| gldm_SmallDependenceLowGrayLevelEmphasis_Base  | -1014.191344 |

The Radiomics features named as: Feature type\_Feature name\_Extraction area. WP: whole prostate.

**Table S8.** The trained In-house - V-Net model intercept and coefficients.

| Feature                                   | Coefficient  |
|-------------------------------------------|--------------|
| Intercept                                 | -665.676     |
| firstorder_10Percentile_WP                | 0.607        |
| firstorder_Energy_WP                      | -2.47051E-08 |
| firstorder_Kurtosis_WP                    | -3.202042156 |
| firstorder_MeanAbsoluteDeviation_WP       | 0.823        |
| firstorder_Minimum_WP                     | -0.060290664 |
| firstorder_Skewness_WP                    | 6.37         |
| firstorder_Uniformity_WP                  | 964.467      |
| firstorder_Variance_WP                    | 0.022        |
| shape_Elongation_WP                       | 2.541        |
| shape_Flatness_WP                         | -11.00444747 |
| shape_LeastAxisLength_WP                  | -0.185191432 |
| shape_MajorAxisLength_WP                  | -1.024911096 |
| shape_Maximum2DDiameterColumn_WP          | 0.217        |
| shape_Maximum2DDiameterRow_WP             | 0.035        |
| shape_Maximum3DDiameter_WP                | -0.090905338 |
| shape_Sphericity_WP                       | 161.442      |
| glcm_ClusterShade_WP                      | -0.003112853 |
| glcm_DifferenceVariance_WP                | -0.185309313 |
| glcm_JointAverage_WP                      | 0.219        |
| glcm_MCC_WP                               | 37.95        |
| glcm_MaximumProbability_WP                | 867.141      |
| glcm_SumAverage_WP                        | 0.008326982  |
| glrlm_GrayLevelNonUniformityNormalized_WP | 812.002      |
| glszm_GrayLevelVariance_WP                | -0.001948064 |
| glszm_LargeAreaHighGrayLevelEmphasis_WP   | -7.69233E-06 |
| glszm_LargeAreaLowGrayLevelEmphasis_WP    | 0.033        |
| glszm_LowGrayLevelZoneEmphasis_WP         | -988.8339253 |
| glszm_SizeZoneNonUniformity_WP            | 0.002356206  |
| glszm_SizeZoneNonUniformityNormalized_WP  | 38.939       |
| glszm_SmallAreaLowGrayLevelEmphasis_WP    | -2355.458998 |
| glszm_ZoneEntropy_WP                      | 11.398       |
| ngtdm_Busyness_WP                         | -0.169001974 |
| ngtdm_Complexity_WP                       | 0.002545098  |
| ngtdm_Strength_WP                         | -4.096543889 |
| gldm_DependenceEntropy_WP                 | 20.5         |
| gldm_DependenceVariance_WP                | -1.415300226 |

|                                                |              |
|------------------------------------------------|--------------|
| gldm_GrayLevelNonUniformity_WP                 | -0.001548627 |
| gldm_LargeDependenceLowGrayLevelEmphasis_WP    | -22.42378295 |
| gldm_SmallDependenceLowGrayLevelEmphasis_WP    | 9605.562     |
| firstorder_Kurtosis_Apex                       | -1.468692815 |
| firstorder_Mean_Apex                           | -0.102365267 |
| firstorder_Minimum_Apex                        | 1.103        |
| firstorder_Range_Apex                          | -0.040394544 |
| firstorder_TotalEnergy_Apex                    | 8.33531E-09  |
| firstorder_Uniformity_Apex                     | -94.07051406 |
| shape_Flatness_Apex                            | 12.813       |
| shape_LeastAxisLength_Apex                     | -1.13644107  |
| shape_MajorAxisLength_Apex                     | 0.061        |
| shape_Maximum2DDiameterColumn_Apex             | 0.058        |
| shape_Maximum2DDiameterRow_Apex                | -0.00670403  |
| shape_Maximum2DDiameterSlice_Apex              | -0.126244377 |
| shape_Maximum3DDiameter_Apex                   | -0.170450804 |
| shape_MinorAxisLength_Apex                     | -0.606954253 |
| shape_Sphericity_Apex                          | -115.8931811 |
| shape_SurfaceVolumeRatio_Apex                  | -47.23503452 |
| glcm_ClusterProminence_Apex                    | -1.02783E-05 |
| glcm_ClusterShade_Apex                         | 0.000543035  |
| glcm_Correlation_Apex                          | -5.541639536 |
| glcm_Idm_Apex                                  | -30.61394688 |
| glcm_Imc1_Apex                                 | 76.203       |
| glcm_MCC_Apex                                  | 10.11        |
| glrlm_GrayLevelNonUniformity_Apex              | 0.008073803  |
| glrlm_LongRunLowGrayLevelEmphasis_Apex         | 59.78        |
| glszm_GrayLevelVariance_Apex                   | -0.022018761 |
| glszm_HighGrayLevelZoneEmphasis_Apex           | 0.027        |
| glszm_SizeZoneNonUniformity_Apex               | -0.003308016 |
| glszm_SizeZoneNonUniformityNormalized_Apex     | -31.49718966 |
| glszm_SmallAreaLowGrayLevelEmphasis_Apex       | -980.0185665 |
| ngtdm_Busyness_Apex                            | 6.393        |
| ngtdm_Coarseness_Apex                          | -12137.96129 |
| ngtdm_Complexity_Apex                          | -0.000147367 |
| ngtdm_Strength_Apex                            | 7.118        |
| gldm_GrayLevelNonUniformity_Apex               | 0.007816823  |
| gldm_LargeDependenceHighGrayLevelEmphasis_Apex | -0.000363938 |
| gldm_LargeDependenceLowGrayLevelEmphasis_Apex  | 17.551       |
| firstorder_90Percentile_Base                   | 0.311        |
| firstorder_Energy_Base                         | -5.24322E-08 |
| firstorder_InterquartileRange_Base             | -0.409002608 |
| firstorder_Maximum_Base                        | -0.15112896  |
| firstorder_Minimum_Base                        | -0.358450791 |
| firstorder_Skewness_Base                       | -0.554905249 |
| shape_Elongation_Base                          | 2.538        |
| shape_Flatness_Base                            | 35.184       |
| shape_LeastAxisLength_Base                     | -0.375346084 |
| shape_MajorAxisLength_Base                     | 0.373        |
| shape_Maximum2DDiameterColumn_Base             | -0.204313436 |
| shape_Maximum2DDiameterRow_Base                | -0.418496704 |

|                                                |              |
|------------------------------------------------|--------------|
| shape_Maximum2DDiameterSlice_Base              | 0.048        |
| shape_Maximum3DDiameter_Base                   | 0.025        |
| shape_Sphericity_Base                          | -39.96665213 |
| shape_SurfaceArea_Base                         | 0.003922066  |
| shape_SurfaceVolumeRatio_Base                  | -14.51836726 |
| glcm_ClusterProminence_Base                    | 4.57063E-06  |
| glcm_ClusterTendency_Base                      | 0.012        |
| glcm_Correlation_Base                          | -5.153969245 |
| glcm_DifferenceVariance_Base                   | 0.176        |
| glcm_Idn_Base                                  | 404.812      |
| glcm_Imc1_Base                                 | -6.685165756 |
| glcm_Imc2_Base                                 | 1.258        |
| glcm_JointAverage_Base                         | 0.925        |
| glcm_JointEnergy_Base                          | -1718.336606 |
| glcm_MCC_Base                                  | 2.527        |
| glcm_MaximumProbability_Base                   | -401.0091738 |
| glrlm_GrayLevelNonUniformity_Base              | 0.004031616  |
| glrlm_GrayLevelNonUniformityNormalized_Base    | 99.731       |
| glrlm_ShortRunLowGrayLevelEmphasis_Base        | 366.209      |
| glszm_GrayLevelNonUniformity_Base              | 0.00597847   |
| glszm_HighGrayLevelZoneEmphasis_Base           | -0.04705148  |
| glszm_LargeAreaEmphasis_Base                   | 0.002089843  |
| glszm_LargeAreaHighGrayLevelEmphasis_Base      | -1.61651E-05 |
| glszm_LowGrayLevelZoneEmphasis_Base            | 36.704       |
| glszm_SmallAreaEmphasis_Base                   | 98.631       |
| glszm_ZoneVariance_Base                        | 0.003766068  |
| ngtdm_Busyness_Base                            | 0.447        |
| ngtdm_Complexity_Base                          | -0.00019638  |
| ngtdm_Strength_Base                            | 1.893        |
| gldm_DependenceNonUniformityNormalized_Base    | -43.49194441 |
| gldm_LargeDependenceHighGrayLevelEmphasis_Base | 0.000813639  |
| gldm_SmallDependenceLowGrayLevelEmphasis_Base  | -1314.284524 |

The Radiomics features named as: Feature type\_Feature name\_Extraction area. WP: whole prostate.

**Table S9.** The trained In-house - nnU-Net-2D model intercept and coefficients.

| Feature                          | Coefficient  |
|----------------------------------|--------------|
| Intercept                        | -75.803      |
| firstorder_10Percentile_WP       | -0.952585663 |
| firstorder_InterquartileRange_WP | -0.804508418 |
| firstorder_Kurtosis_WP           | 1.149        |
| firstorder_Maximum_WP            | 0.239        |
| firstorder_Minimum_WP            | 1.595        |
| firstorder_Skewness_WP           | -5.171647096 |
| firstorder_Variance_WP           | 0.016        |
| shape_Elongation_WP              | -14.52052431 |
| shape_Flatness_WP                | -9.36098304  |
| shape_MajorAxisLength_WP         | -0.448750298 |
| shape_Maximum2DDiameterColumn_WP | -0.355542567 |
| shape_Maximum2DDiameterRow_WP    | -0.230861438 |
| shape_Maximum2DDiameterSlice_WP  | -0.13734098  |
| shape_Sphericity_WP              | 80.22        |

|                                              |              |
|----------------------------------------------|--------------|
| shape_SurfaceArea_WP                         | 0.00059422   |
| shape_SurfaceVolumeRatio_WP                  | 182.034      |
| shape_VoxelVolume_WP                         | 0.000197024  |
| glcm_ClusterShade_WP                         | -0.0002725   |
| glcm_Idmn_WP                                 | 133.637      |
| glcm_Imc1_WP                                 | -160.1112042 |
| glcm_Imc2_WP                                 | -52.75569003 |
| glcm_InverseVariance_WP                      | -83.77687998 |
| glcm_MCC_WP                                  | -25.98528238 |
| glcm_MaximumProbability_WP                   | 104.238      |
| glszm_GrayLevelVariance_WP                   | 0.198        |
| glszm_LargeAreaLowGrayLevelEmphasis_WP       | 0.082        |
| glszm_LowGrayLevelZoneEmphasis_WP            | -109.501208  |
| glszm_SizeZoneNonUniformityNormalized_WP     | 2.242        |
| ngtdm_Busyness_WP                            | -1.679498807 |
| ngtdm_Complexity_WP                          | 9.96145E-05  |
| ngtdm_Contrast_WP                            | -58.94837564 |
| ngtdm_Strength_WP                            | -40.34304987 |
| gldm_DependenceNonUniformity_WP              | 0.001733947  |
| gldm_LargeDependenceHighGrayLevelEmphasis_WP | 0.002343983  |
| gldm_LargeDependenceLowGrayLevelEmphasis_WP  | 32.69        |
| firstorder_Energy_Apex                       | -2.25125E-08 |
| firstorder_Kurtosis_Apex                     | -4.694483056 |
| firstorder_Mean_Apex                         | 0.081        |
| firstorder_Median_Apex                       | 0.2          |
| firstorder_Minimum_Apex                      | 0.026        |
| firstorder_RobustMeanAbsoluteDeviation_Apex  | -0.612443446 |
| firstorder_Skewness_Apex                     | 2.87         |
| firstorder_Variance_Apex                     | -0.014627929 |
| shape_Elongation_Apex                        | -1.486408625 |
| shape_Flatness_Apex                          | -5.474652002 |
| shape_LeastAxisLength_Apex                   | 0.322        |
| shape_MajorAxisLength_Apex                   | 0.356        |
| shape_Maximum2DDiameterColumn_Apex           | 0.062        |
| shape_Maximum2DDiameterRow_Apex              | -0.120393147 |
| shape_Maximum2DDiameterSlice_Apex            | -0.306718435 |
| shape_Maximum3DDiameter_Apex                 | 0.118        |
| shape_Sphericity_Apex                        | -25.47544312 |
| shape_SurfaceArea_Apex                       | -0.00115801  |
| glcm_Autocorrelation_Apex                    | 0.00212524   |
| glcm_ClusterProminence_Apex                  | 1.35505E-05  |
| glcm_ClusterShade_Apex                       | 0.00023352   |
| glcm_Correlation_Apex                        | -31.78202127 |
| glcm_DifferenceVariance_Apex                 | 0.004458033  |
| glcm_Imc2_Apex                               | -19.37831006 |
| glcm_InverseVariance_Apex                    | -75.37312521 |
| glcm_JointEnergy_Apex                        | -650.9100976 |
| glcm_MCC_Apex                                | 30.236       |
| glcm_MaximumProbability_Apex                 | 1369.891     |
| glcm_SumEntropy_Apex                         | 23.394       |
| glrlm_GrayLevelNonUniformity_Apex            | -0.008937945 |

|                                                |              |
|------------------------------------------------|--------------|
| glrlm_LongRunEmphasis_Apex                     | -78.29580954 |
| glrlm_ShortRunEmphasis_Apex                    | 340.148      |
| glszm_GrayLevelNonUniformity_Apex              | -3.15839E-07 |
| glszm_LargeAreaHighGrayLevelEmphasis_Apex      | 8.70944E-05  |
| glszm_LowGrayLevelZoneEmphasis_Apex            | -892.9189737 |
| glszm_SizeZoneNonUniformity_Apex               | 0.000268337  |
| glszm_SmallAreaEmphasis_Apex                   | 68.688       |
| glszm_ZoneEntropy_Apex                         | -1.497017078 |
| glszm_ZonePercentage_Apex                      | -298.2110028 |
| ngtdm_Contrast_Apex                            | 5.488        |
| gldm_DependenceEntropy_Apex                    | -22.24853234 |
| gldm_LargeDependenceEmphasis_Apex              | -1.350096236 |
| gldm_LargeDependenceHighGrayLevelEmphasis_Apex | -0.001367631 |
| gldm_LowGrayLevelEmphasis_Apex                 | 1109.321     |
| firstorder_90Percentile_Base                   | 0.038        |
| firstorder_InterquartileRange_Base             | 0.056        |
| firstorder_Maximum_Base                        | -0.068806763 |
| firstorder_Median_Base                         | -0.167674187 |
| firstorder_Minimum_Base                        | -0.108160733 |
| firstorder_Skewness_Base                       | -3.71693444  |
| firstorder_TotalEnergy_Base                    | 4.37878E-08  |
| firstorder_Variance_Base                       | 0.009403888  |
| shape_Elongation_Base                          | 41.712       |
| shape_Flatness_Base                            | -15.3874693  |
| shape_LeastAxisLength_Base                     | 0.022        |
| shape_MajorAxisLength_Base                     | 0.467        |
| shape_Maximum2DDiameterColumn_Base             | 0.034        |
| shape_Maximum2DDiameterRow_Base                | -0.106613069 |
| shape_Maximum2DDiameterSlice_Base              | 0.362        |
| shape_MinorAxisLength_Base                     | -0.895357483 |
| shape_Sphericity_Base                          | 1.776        |
| shape_SurfaceArea_Base                         | 0.001371277  |
| glcm_Autocorrelation_Base                      | -0.018914542 |
| glcm_ClusterShade_Base                         | 0.000367885  |
| glcm_Correlation_Base                          | 4.784        |
| glcm_DifferenceVariance_Base                   | -0.13629786  |
| glcm_Imc1_Base                                 | 36.779       |
| glcm_Imc2_Base                                 | -27.53258125 |
| glcm_JointEnergy_Base                          | 491.857      |
| glcm_JointEntropy_Base                         | 3.118        |
| glcm_MCC_Base                                  | 10.865       |
| glrlm_RunEntropy_Base                          | 15.824       |
| glrlm_RunLengthNonUniformity_Base              | -0.000408762 |
| glszm_HighGrayLevelZoneEmphasis_Base           | 0.026        |
| glszm_LargeAreaEmphasis_Base                   | -0.034765993 |
| glszm_SizeZoneNonUniformity_Base               | -0.003023618 |
| glszm_SmallAreaLowGrayLevelEmphasis_Base       | 1459.157     |
| glszm_ZoneEntropy_Base                         | -15.84480995 |
| glszm_ZonePercentage_Base                      | -79.29353486 |
| ngtdm_Coarseness_Base                          | 2348.112     |
| ngtdm_Complexity_Base                          | 0.001814881  |

|                                               |              |
|-----------------------------------------------|--------------|
| ngtdm_Contrast_Base                           | 31.051       |
| gldm_GrayLevelVariance_Base                   | -0.159526151 |
| gldm_LargeDependenceEmphasis_Base             | -0.042181185 |
| gldm_LowGrayLevelEmphasis_Base                | -834.1902871 |
| gldm_SmallDependenceLowGrayLevelEmphasis_Base | -408.9185167 |

The Radiomics features named as: Feature type\_Feature name\_Extraction area. WP: whole prostate.

**Table S10.** The trained In-house - nnU-Net-3D model intercept and coefficients.

| Feature                                     | Coefficient  |
|---------------------------------------------|--------------|
| Intercept                                   | -149.82      |
| firstorder_Energy_WP                        | -2.47222E-08 |
| firstorder_InterquartileRange_WP            | -0.106069147 |
| firstorder_Kurtosis_WP                      | -1.647215782 |
| firstorder_Mean_WP                          | 1.313        |
| firstorder_Minimum_WP                       | 1.037        |
| firstorder_Range_WP                         | -0.165230167 |
| firstorder_Skewness_WP                      | 25.027       |
| shape_Elongation_WP                         | 0.561        |
| shape_Flatness_WP                           | 12.073       |
| shape_LeastAxisLength_WP                    | -0.288934047 |
| shape_MajorAxisLength_WP                    | -0.02937799  |
| shape_Maximum2DDiameterRow_WP               | 0.013        |
| shape_Maximum2DDiameterSlice_WP             | 0.062        |
| shape_Maximum3DDiameter_WP                  | -0.106485299 |
| shape_MinorAxisLength_WP                    | 0.123        |
| shape_Sphericity_WP                         | 100.511      |
| glcm_ClusterShade_WP                        | -0.003130491 |
| glcm_ClusterTendency_WP                     | 0.04         |
| glcm_Contrast_WP                            | -0.000125038 |
| glcm_Correlation_WP                         | 0.053        |
| glcm_DifferenceVariance_WP                  | -0.198911163 |
| glcm_Imc2_WP                                | -1.265234243 |
| glcm_InverseVariance_WP                     | -20.32500725 |
| glcm_MaximumProbability_WP                  | 717.81       |
| glrlm_ShortRunEmphasis_WP                   | 345.005      |
| glszm_GrayLevelNonUniformity_WP             | 0.009552618  |
| glszm_LargeAreaHighGrayLevelEmphasis_WP     | -2.47514E-06 |
| glszm_LargeAreaLowGrayLevelEmphasis_WP      | -0.387610541 |
| glszm_LowGrayLevelZoneEmphasis_WP           | -459.4574471 |
| glszm_SizeZoneNonUniformity_WP              | 0.000138626  |
| glszm_SmallAreaHighGrayLevelEmphasis_WP     | -0.021041159 |
| glszm_SmallAreaLowGrayLevelEmphasis_WP      | -1052.318132 |
| glszm_ZoneEntropy_WP                        | -12.53775801 |
| ngtdm_Busyness_WP                           | 1.568        |
| ngtdm_Coarseness_WP                         | -26321.58435 |
| ngtdm_Complexity_WP                         | -0.001319323 |
| ngtdm_Strength_WP                           | 14.672       |
| gldm_DependenceEntropy_WP                   | 18.6         |
| gldm_LargeDependenceLowGrayLevelEmphasis_WP | 69.318       |
| firstorder_10Percentile_Apex                | -0.157698579 |
| firstorder_InterquartileRange_Apex          | -0.299308216 |

|                                                |              |
|------------------------------------------------|--------------|
| firstorder_Kurtosis_Apex                       | -4.023784202 |
| firstorder_Minimum_Apex                        | -0.86249131  |
| firstorder_Range_Apex                          | 0.109        |
| firstorder_TotalEnergy_Apex                    | 8.38876E-08  |
| firstorder_Variance_Apex                       | -0.012439016 |
| shape_Elongation_Apex                          | 6.766        |
| shape_LeastAxisLength_Apex                     | 0.205        |
| shape_MajorAxisLength_Apex                     | 0.173        |
| shape_Maximum2DDiameterColumn_Apex             | 0.068        |
| shape_Maximum2DDiameterRow_Apex                | -0.05706543  |
| shape_Maximum2DDiameterSlice_Apex              | -0.269497398 |
| shape_Maximum3DDiameter_Apex                   | 0.136        |
| shape_Sphericity_Apex                          | 0.508        |
| shape_SurfaceArea_Apex                         | -0.00020118  |
| shape_SurfaceVolumeRatio_Apex                  | -9.955860422 |
| glcm_Autocorrelation_Apex                      | 0.048        |
| glcm_ClusterProminence_Apex                    | 1.80532E-06  |
| glcm_ClusterShade_Apex                         | 0.000398695  |
| glcm_Correlation_Apex                          | -21.41000414 |
| glcm_DifferenceEntropy_Apex                    | -5.340768914 |
| glcm_DifferenceVariance_Apex                   | -0.009513745 |
| glcm_Idm_Apex                                  | 193.115      |
| glcm_Imc2_Apex                                 | -5.607008112 |
| glcm_MCC_Apex                                  | 8.623        |
| glcm_MaximumProbability_Apex                   | 9.281        |
| glcm_SumAverage_Apex                           | 0.103        |
| glrlm_ShortRunLowGrayLevelEmphasis_Apex        | 599.045      |
| glszm_GrayLevelVariance_Apex                   | 0.179        |
| glszm_LargeAreaEmphasis_Apex                   | 0.085        |
| glszm_LargeAreaLowGrayLevelEmphasis_Apex       | -0.671634403 |
| glszm_SmallAreaEmphasis_Apex                   | -110.3198284 |
| glszm_SmallAreaLowGrayLevelEmphasis_Apex       | -217.001015  |
| glszm_ZoneEntropy_Apex                         | -26.84580904 |
| glszm_ZoneVariance_Apex                        | 0.015        |
| ngtdm_Busyness_Apex                            | 1.381        |
| ngtdm_Coarseness_Apex                          | -2782.771041 |
| ngtdm_Complexity_Apex                          | 0.000275014  |
| gldm_GrayLevelNonUniformity_Apex               | -0.011243202 |
| gldm_LargeDependenceHighGrayLevelEmphasis_Apex | -0.005852267 |
| gldm_LargeDependenceLowGrayLevelEmphasis_Apex  | -4.484751303 |
| firstorder_10Percentile_Base                   | -0.221789269 |
| firstorder_Energy_Base                         | -2.31411E-08 |
| firstorder_InterquartileRange_Base             | -0.191553975 |
| firstorder_Kurtosis_Base                       | 0.28         |
| firstorder_Minimum_Base                        | -0.10033044  |
| firstorder_Uniformity_Base                     | 511.824      |
| shape_Elongation_Base                          | 9.012        |
| shape_Flatness_Base                            | -22.76796896 |
| shape_LeastAxisLength_Base                     | -0.491363729 |
| shape_MajorAxisLength_Base                     | -0.023559668 |
| shape_Maximum2DDiameterColumn_Base             | 0.046        |



|                                               |              |
|-----------------------------------------------|--------------|
| shape_Maximum2DDiameterRow_Base               | -0.017964975 |
| shape_Maximum2DDiameterSlice_Base             | 0.095        |
| shape_Maximum3DDiameter_Base                  | -0.198770216 |
| shape_MinorAxisLength_Base                    | -0.457096178 |
| shape_Sphericity_Base                         | -2.336855096 |
| shape_SurfaceArea_Base                        | 0.003600587  |
| shape_SurfaceVolumeRatio_Base                 | -4.416308449 |
| glcm_ClusterProminence_Base                   | -3.5651E-06  |
| glcm_Contrast_Base                            | -0.171013698 |
| glcm_Correlation_Base                         | 0.145        |
| glcm_Imc1_Base                                | 35.684       |
| glcm_Imc2_Base                                | -7.574759687 |
| glcm_JointAverage_Base                        | 0.861        |
| glcm_JointEnergy_Base                         | -958.2169646 |
| glcm_MCC_Base                                 | 7.3          |
| glcm_MaximumProbability_Base                  | -734.7529329 |
| glrlm_RunVariance_Base                        | -154.8836307 |
| glrlm_ShortRunHighGrayLevelEmphasis_Base      | -0.021418708 |
| glszm_GrayLevelNonUniformityNormalized_Base   | -628.9855369 |
| glszm_LargeAreaHighGrayLevelEmphasis_Base     | 0.000268432  |
| glszm_LargeAreaLowGrayLevelEmphasis_Base      | -2.395007695 |
| glszm_SizeZoneNonUniformity_Base              | -0.002338366 |
| glszm_SmallAreaEmphasis_Base                  | 36.437       |
| ngtdm_Busyness_Base                           | -0.888311909 |
| ngtdm_Complexity_Base                         | 6.33956E-05  |
| ngtdm_Contrast_Base                           | 50.932       |
| ngtdm_Strength_Base                           | -0.323326191 |
| gldm_DependenceNonUniformityNormalized_Base   | -34.53125393 |
| gldm_LargeDependenceLowGrayLevelEmphasis_Base | 37.811       |
| gldm_LowGrayLevelEmphasis_Base                | 371.773      |

---

The Radiomics features named as: Feature type\_Feature name\_Extraction area. WP: whole prostate.
